# Supplementary material for: The genomic landscape of small cell carcinoma of the esophagus
Source: PubMed Central journal article supplement — Cell Res. 2018 May 4;28(7):771–4. doi: 10.1038/s41422-018-0039-1 (PMC6028429; doi:10.1038/s41422-018-0039-1), 2018-05-04
Supplement: 41422_2018_39_MOESM2_ESM.pdf [file 41422_2018_39_MOESM2_ESM.pdf]

# Supplementary Figures

## Figure S1

**a**

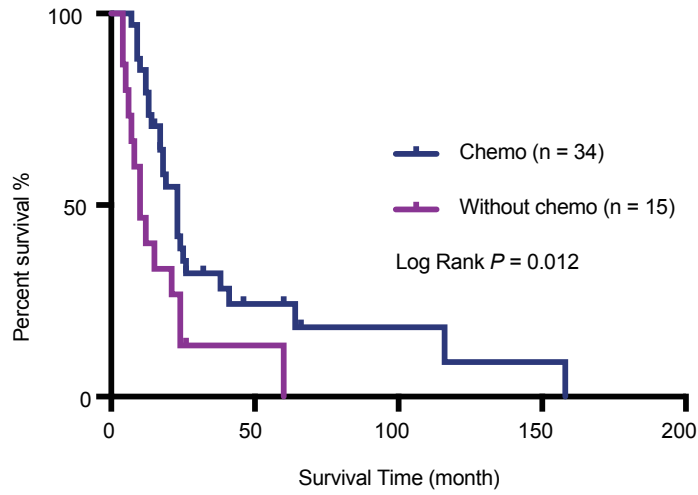

**b**

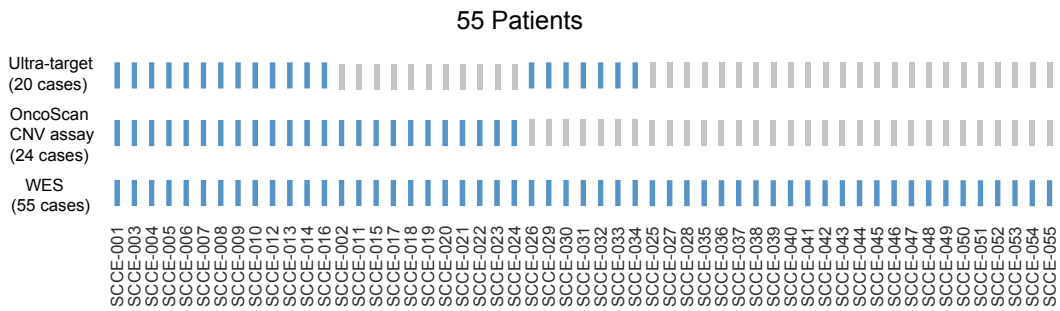

**Supplementary information, Figure S1** Clinical characterization and sample profiling for 55 patients with SCCE. **a** Kaplan-Meier survival curves for patients with SCCE who received chemotherapy or not. **b** Columns represent samples while rows correspond to platforms. WES denotes whole exome sequencing.
