# Supplementary material for: The genomic landscape of small cell carcinoma of the esophagus
Source: PubMed Central journal article supplement — Cell Res. 2018 May 4;28(7):771–4. doi: 10.1038/s41422-018-0039-1 (PMC6028429; doi:10.1038/s41422-018-0039-1), 2018-05-04
Supplement: 41422_2018_39_MOESM4_ESM.pdf [file 41422_2018_39_MOESM4_ESM.pdf]

Figure S3

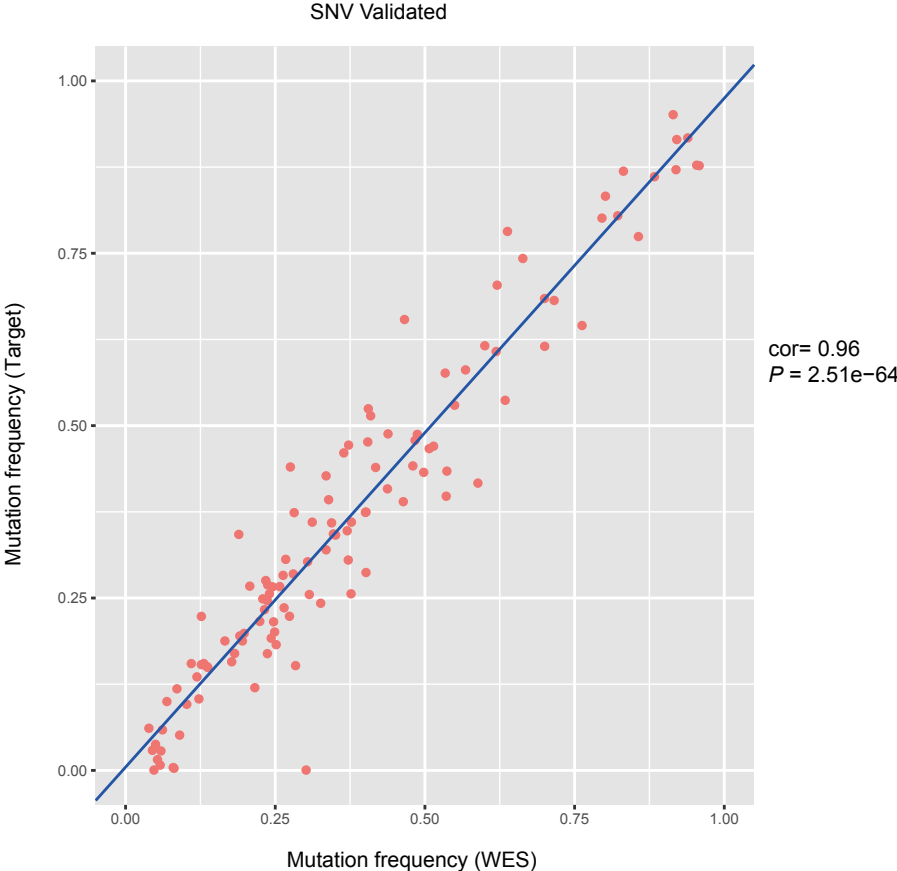

**Supplementary information, Figure S3** Mutation frequency validation for SNVs by ultra-deep targeted sequencing. Each dot represents a SNV. X-axis and Y-axis denote the mutation frequency of each SNVs in whole exome and ultra-deep targeted sequencing data. Mutation frequency is calculated by (supporting reads)/(total reads) in the SNV site. Pearson correlation was shown.
