# Supplementary material for: The genomic landscape of small cell carcinoma of the esophagus
Source: PubMed Central journal article supplement — Cell Res. 2018 May 4;28(7):771–4. doi: 10.1038/s41422-018-0039-1 (PMC6028429; doi:10.1038/s41422-018-0039-1), 2018-05-04
Supplement: 41422_2018_39_MOESM5_ESM.pdf [file 41422_2018_39_MOESM5_ESM.pdf]

Figure S4

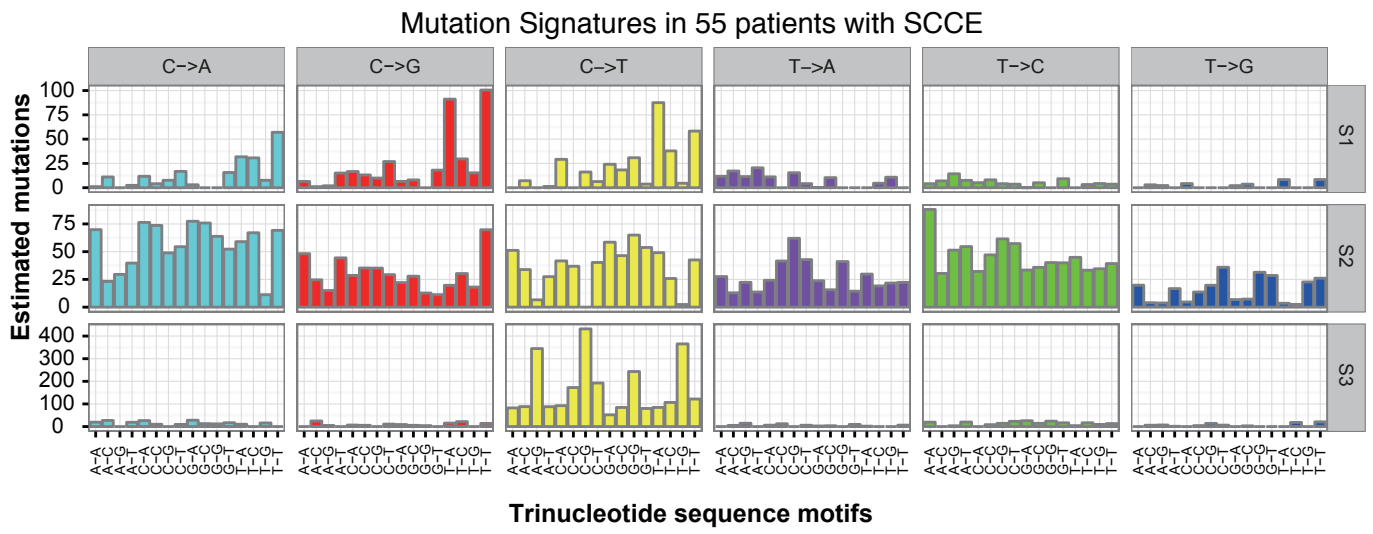

**Supplementary information, Figure S4** Mutation signatures identified in 55 patients with SCCE. Each signature is displayed according to the 96 substitution classification defined by the substitution class and sequence context. The mutation types are on the horizontal axes, whereas vertical axes depict the estimated number of mutations attributed to a specific mutation type.
