# Supplementary material for: The genomic landscape of small cell carcinoma of the esophagus
Source: PubMed Central journal article supplement — Cell Res. 2018 May 4;28(7):771–4. doi: 10.1038/s41422-018-0039-1 (PMC6028429; doi:10.1038/s41422-018-0039-1), 2018-05-04
Supplement: 41422_2018_39_MOESM6_ESM.pdf [file 41422_2018_39_MOESM6_ESM.pdf]

# Figure S5

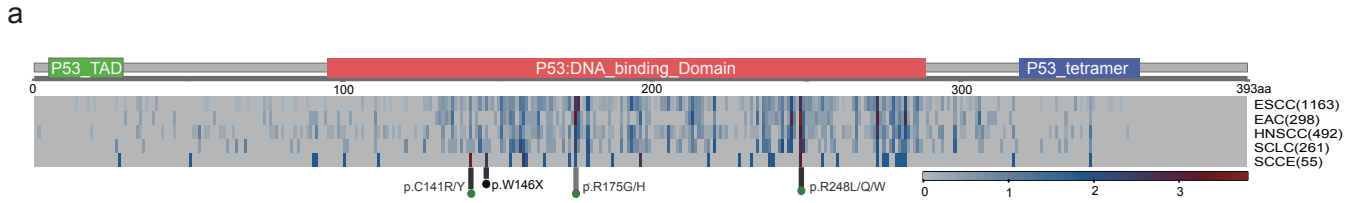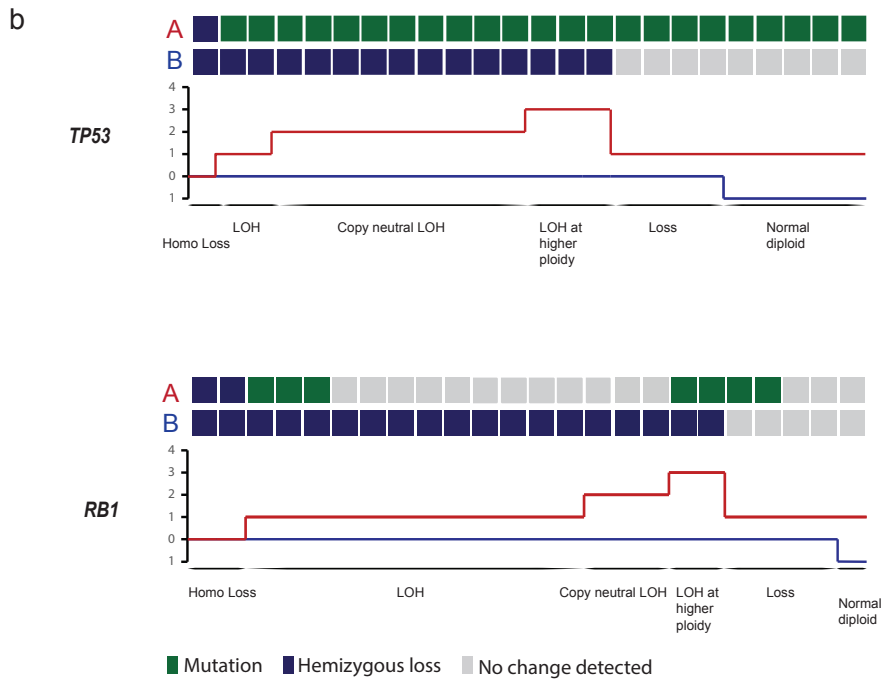

### **Supplementary information, Figure S5** Characterization of *TP53* and *RBI*

mutations. **a** Heat map of *TP53* coding mutation. Upper panel shows the protein structure of *TP53* with domains labelled in different colors. Lower panel (heat map) denotes the mutation fraction of each amino acid. Mutations with high fraction are marked. Except SCCE, all mutation data of the other cancers are adopted from the IARC TP53 mutation database<sup>1</sup>. **b** Bi-allelic inactivation of *TP53* and *RBI* in SCCE. Somatic mutations and copy number alterations of *TP53* and *RBI* were determined for the 24 patients who had both whole exome sequencing data and OncoScan CNV FFPE assay data. Samples are plotted from left to right. Alleles A and B are represented for each case and color-coded according to the somatic mutations and copy number alterations. The integral copy number (iCN) state of each allele is plotted; hemizygous losses are annotated as loss of heterozygosity (LOH), copy-neutral LOH or LOH at higher ploidy. Samples retaining allele A and B show alterations on both alleles (bi-allelic alterations).

### **Reference**

1. Bouaoun L, Sonkin D, Ardin M *et al.* TP53 Variations in Human Cancers: New Lessons from the IARC TP53 Database and Genomics Data. *Hum Mutat* 2016; **37**:865-876.
