# Supplementary material for: The genomic landscape of small cell carcinoma of the esophagus
Source: PubMed Central journal article supplement — Cell Res. 2018 May 4;28(7):771–4. doi: 10.1038/s41422-018-0039-1 (PMC6028429; doi:10.1038/s41422-018-0039-1), 2018-05-04
Supplement: 41422_2018_39_MOESM7_ESM.pdf [file 41422_2018_39_MOESM7_ESM.pdf]

Figure S6

a

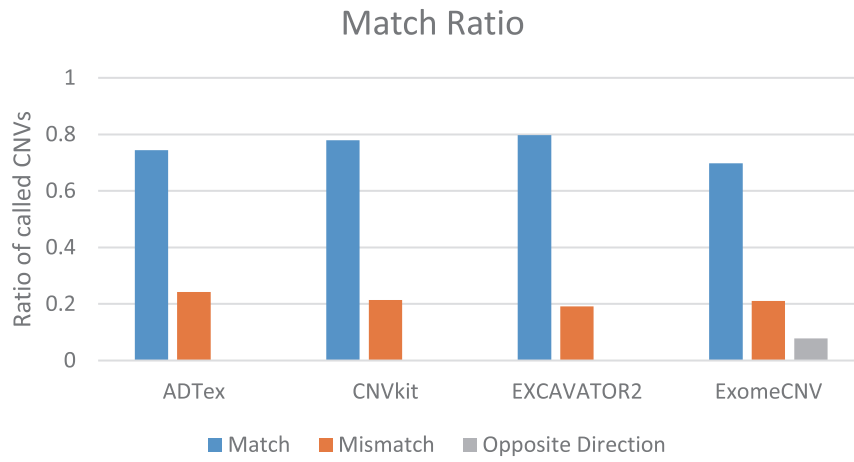

b

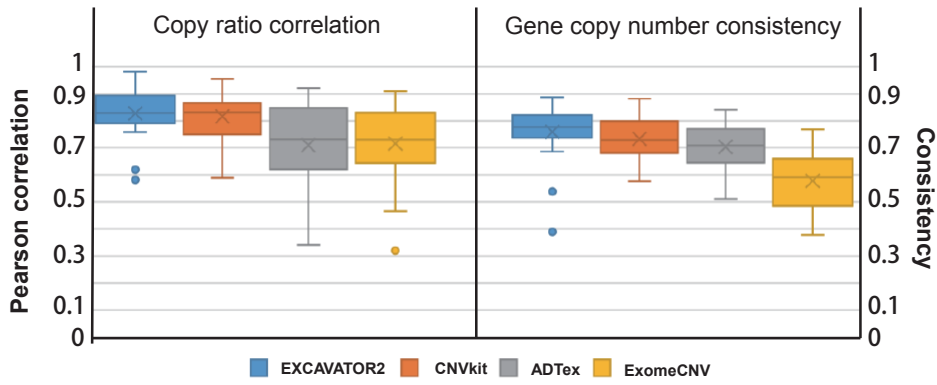

c

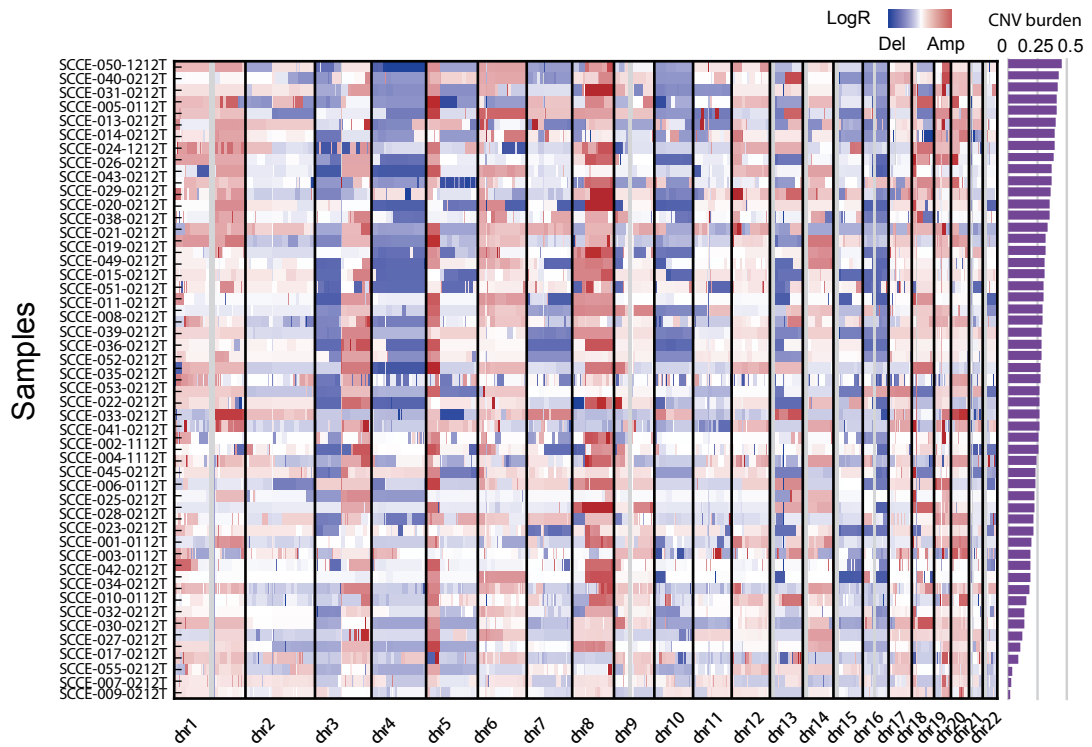

**Supplementary information, Figure S6** Confirmation of exome-based SCNVs with OncoScan CNV assay. **a** The percentages of WES-based CNVs overlapped with the reference CNV set. Match: a CNV region overlaps with the reference at a level of more than 90%. Mismatch: a CNV region overlaps with the reference at a level of less than 90%. Opposite direction: an overlapping gain region was called as a loss, and vice versa. **b** Copy ratio correlation(left) and gene copy number consistency (right) between WES-based CNVs and the reference CNV set. **c** SCNA burden across patients with SCCE. Left: heat map of SCNA of 55 patients with SCCE. Each row depicts a patient. Right panel: SCNA burden for each patient. SCNA burden of each patient is calculated by “length of all copy number segments/whole genome length”.
