# Supplementary material for: The genomic landscape of small cell carcinoma of the esophagus
Source: PubMed Central journal article supplement — Cell Res. 2018 May 4;28(7):771–4. doi: 10.1038/s41422-018-0039-1 (PMC6028429; doi:10.1038/s41422-018-0039-1), 2018-05-04
Supplement: 41422_2018_39_MOESM8_ESM.pdf [file 41422_2018_39_MOESM8_ESM.pdf]

**Figure S7**

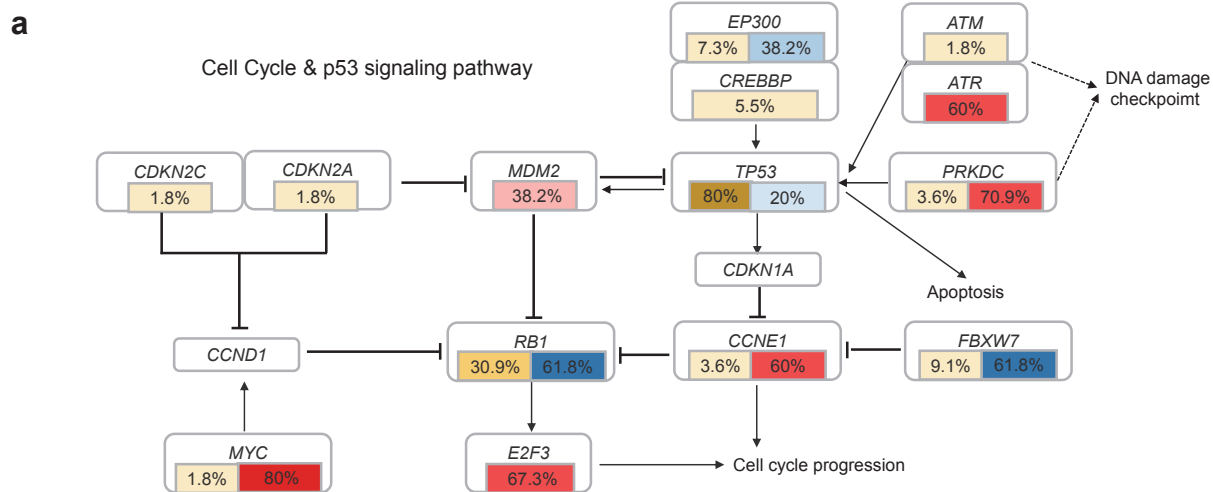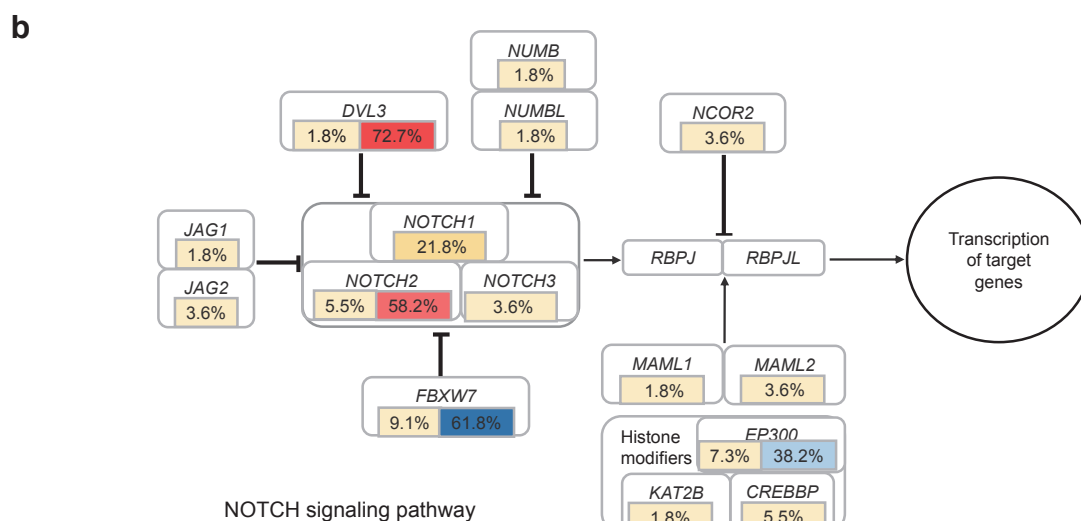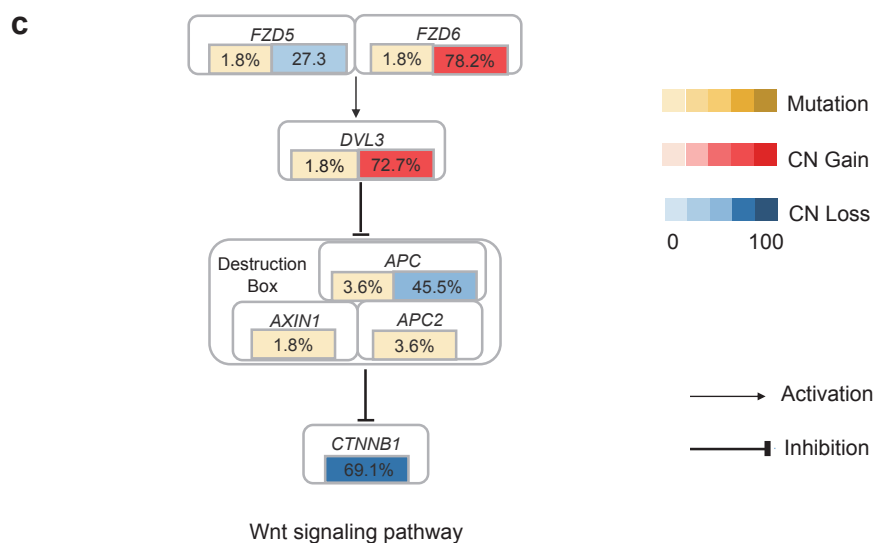

**Supplementary information, Figure S7** Frequently altered pathways in small cell carcinoma of the esophagus. Somatic mutations and copy number changes from 55 tumors were applied to the known topologies of the cell cycle and p53 **(a)**, Notch **(b)** and Wnt signaling pathways **(c)**. Percentages represent alteration frequencies.
