# Supplementary material for: The genomic landscape of small cell carcinoma of the esophagus
Source: PubMed Central journal article supplement — Cell Res. 2018 May 4;28(7):771–4. doi: 10.1038/s41422-018-0039-1 (PMC6028429; doi:10.1038/s41422-018-0039-1), 2018-05-04
Supplement: 41422_2018_39_MOESM9_ESM.pdf [file 41422_2018_39_MOESM9_ESM.pdf]

Figure S8

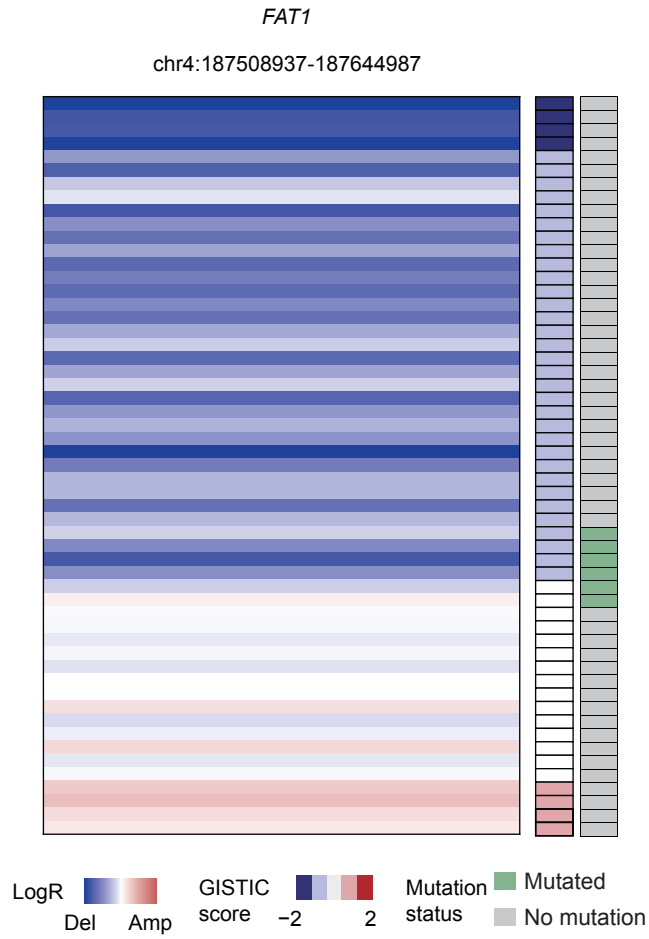

**Supplementary information, Figure S8** Recurrent *FAT1* mutations in SCCE. Left: heat map of copy number alteration for *FAT1*. Each row depicts one patient. Middle column, copy number value of each patient. Values are provided by GISTIC2.0. 2 represents high copy number gain (amplification), 1 represents lower copy number gain, -1 represents low copy number loss and -2 represents higher copy number loss (deletion). Right, somatic mutation status for each patient.
