# Supplementary material for: The genomic landscape of small cell carcinoma of the esophagus
Source: PubMed Central journal article supplement — Cell Res. 2018 May 4;28(7):771–4. doi: 10.1038/s41422-018-0039-1 (PMC6028429; doi:10.1038/s41422-018-0039-1), 2018-05-04
Supplement: 41422_2018_39_MOESM10_ESM.pdf [file 41422_2018_39_MOESM10_ESM.pdf]

Figure S9

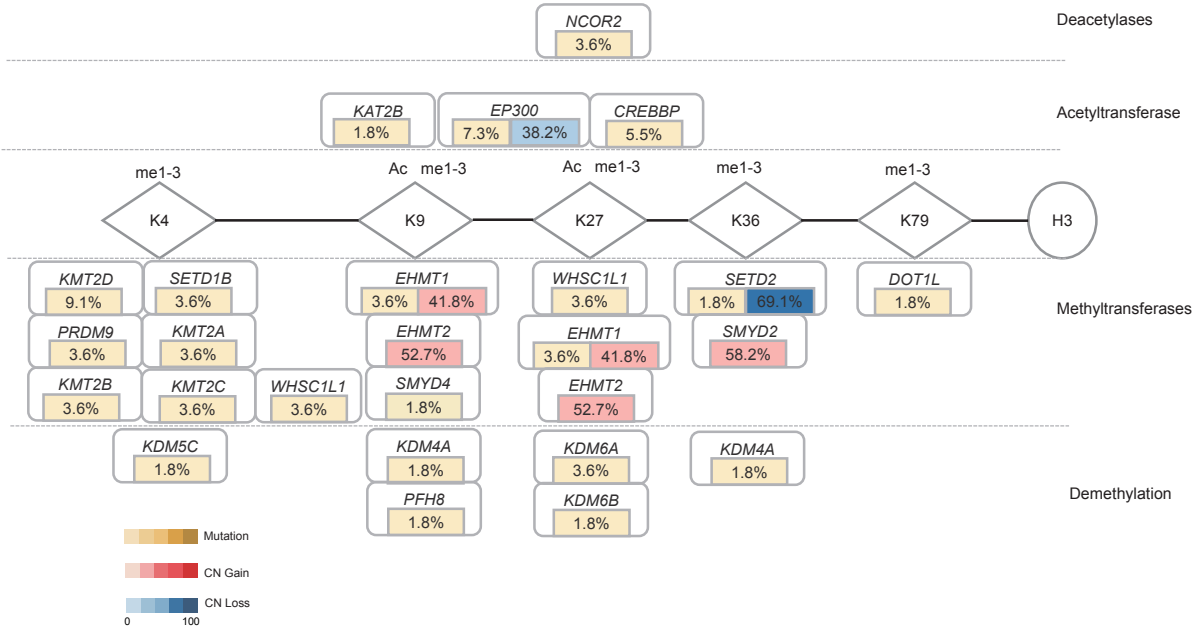

**Supplementary information, Figure S9** Chromatin remodeling genes were frequently mutated in SCCE. The chromatin remodeling genes, grouped vertically by molecular functions, were collected from EpiFactor (<http://epifactors.autosome.ru/>), Histome (<http://www.actrec.gov.in/histome/>) and CREMOFAC (<http://www.jncasr.ac.in/cremofac/>) databases. The frequencies of alterations are labeled as a fraction of all cases and colored on different background by types of alterations as well as frequencies. Yellow was marked for mutations, red for copy number gain and blue for copy number loss.
