# Supplementary material for: The genomic landscape of small cell carcinoma of the esophagus
Source: PubMed Central journal article supplement — Cell Res. 2018 May 4;28(7):771–4. doi: 10.1038/s41422-018-0039-1 (PMC6028429; doi:10.1038/s41422-018-0039-1), 2018-05-04
Supplement: 41422_2018_39_MOESM11_ESM.pdf [file 41422_2018_39_MOESM11_ESM.pdf]

# Figure S10

a

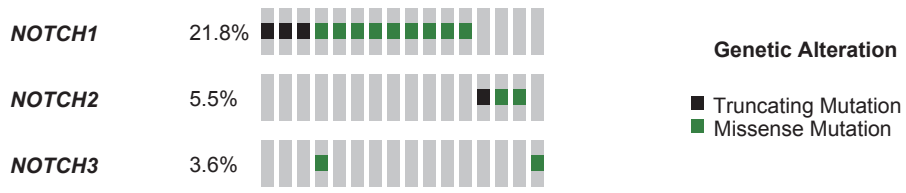

b

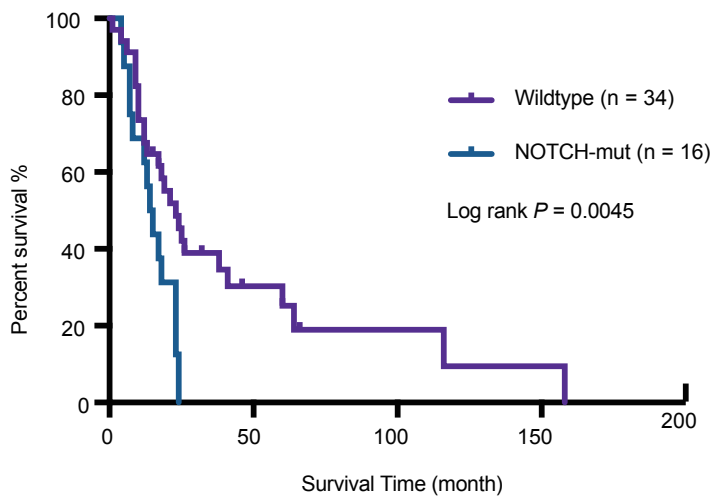

**Supplementary information, Figure S10** Mutational status of NOTCH family genes in 55 patients with SCCE. **a** An oncoprint view of NOTCH family gene mutation status in SCCE samples. Truncating mutation includes mutations or indels annotated to stopgain, frame shift and splicing. **B** Survival analysis of 55 SCCEs with or without NOTCH somatic mutations. Cases without survival information were not included in the analysis.
