# Supplementary material for: The genomic landscape of small cell carcinoma of the esophagus
Source: PubMed Central journal article supplement — Cell Res. 2018 May 4;28(7):771–4. doi: 10.1038/s41422-018-0039-1 (PMC6028429; doi:10.1038/s41422-018-0039-1), 2018-05-04
Supplement: 41422_2018_39_MOESM14_ESM.pdf [file 41422_2018_39_MOESM14_ESM.pdf]

Figure S13

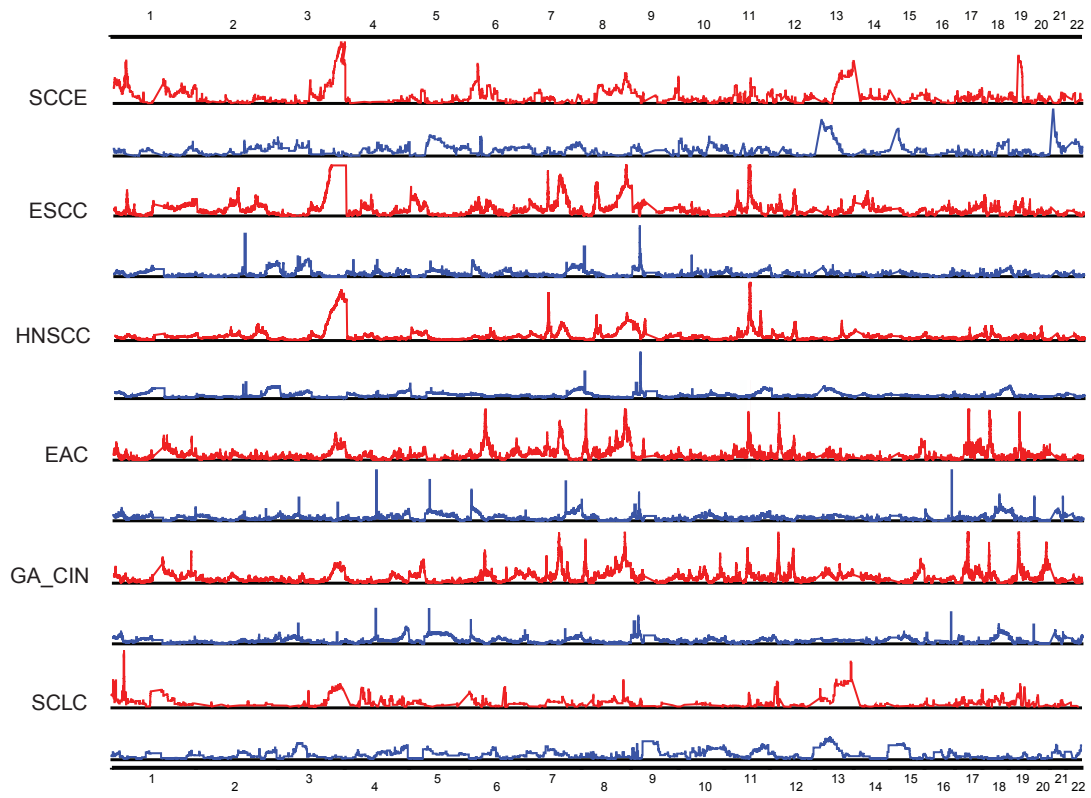

**Supplementary information, Figure S13** Composite copy number profiles for SCCE, ESCC, HNSCC, EAC, GA-CIN and SCLC. Gains are in red and losses are in blue, X-axis are chromosome coordinate and Y-axis represents G-score analyzed by GISTIC2.0.
